# Supplementary material for: A facile strategy for the synthesis of monodispersed W17O47 nanoneedles
Source: Royal Society of Chemistry journal article supplement (doi:10.1039/c6ra01567k), 2016-01-01
Supplement: c6ra01567k1.pdf [file c6ra01567k1.pdf]

## Electronic Supplementary Information

### A Facile Strategy for the Synthesis of Monodispersed $W_{17}O_{47}$

#### Nanoneedles

Lili Lu, Suying Xu, Jiabin Cui, and Leyu Wang\*

State Key Laboratory of Chemical Resource Engineering, Beijing Key Laboratory of Environmentally Harmful Chemical Analysis, Beijing University of Chemical Technology, Beijing 100029, China.

Email (L.Y. Wang): lywang@mail.buct.edu.cn; Tel : 010-64433197 and Fax: 86-10-64427869

**Table S1.** The length, width and aspect ratio of  $W_{17}O_{47}$  nanostructures under different volume ratios of oleic acid (OA) to 1-octadecene (ODE) with 0.2 mmol of sulfur powder and the reaction time at 1 h.

| OA/ODE       | 0.5:9.5 | 1:9   | 2:8  | 3:7 | 5:5 | 7:3 | 8:2 | 10:0 |
|--------------|---------|-------|------|-----|-----|-----|-----|------|
| Length (nm)  | 46.5    | 75.3  | 88.0 | –   | –   | –   | –   | –    |
| Width (nm)   | 6.7     | 4.2   | 9.0  | –   | –   | –   | –   | –    |
| aspect ratio | 6.94    | 17.93 | 9.78 | –   | –   | –   | –   | –    |

**Table S2.** The length, width and aspect ratio of  $W_{17}O_{47}$  nanostructures with the amount of sulfur powder. OA: ODE = 2:8; Reaction time = 1 h.

| sulfur powder(mmol) | 0   | 0.01 | 0.05 | 0.10 | 0.20 | 0.30  |
|---------------------|-----|------|------|------|------|-------|
| Length (nm)         | –   | 88.0 | 65.6 | 87.3 | 88.0 | 133.3 |
| Width (nm)          | 4.9 | 13.5 | 11.5 | 17.0 | 9.0  | 11.1  |
| aspect ratio        | –   | 6.52 | 5.70 | 5.14 | 9.78 | 12.01 |

**Table S3.** The length, width and aspect ratio of  $W_{17}O_{47}$  nanostructures according to different reaction time with 0.2 mmol of sulfur powder. OA:ODE=2:8.

| reaction time | 10 min | 30 min | 1 h  | 2 h  |
|---------------|--------|--------|------|------|
| Length (nm)   | 72.3   | 78.0   | 88.0 | 83.7 |
| Width (nm)    | 8.6    | 9.9    | 9.0  | 8.7  |
| aspect ratio  | 8.4    | 7.88   | 9.78 | 9.6  |

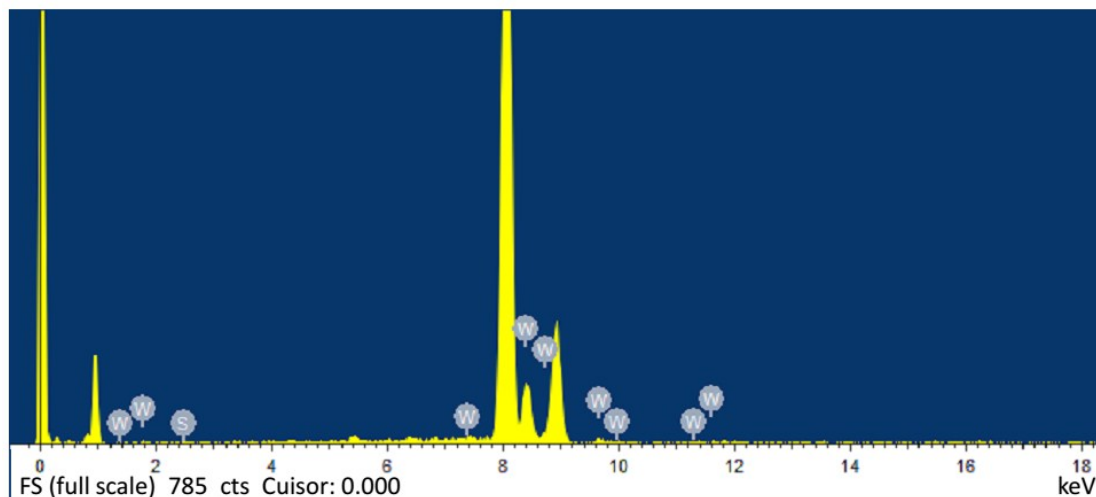

| element | weight percent | atomic percent |
|---------|----------------|----------------|
| S K     | 0.29           | 1.63           |
| W L     | 99.71          | 98.37          |
| total   | 100.00         |                |

**Figure S1.** The EDS images of  $W_{17}O_{47}$  nanoneedles.

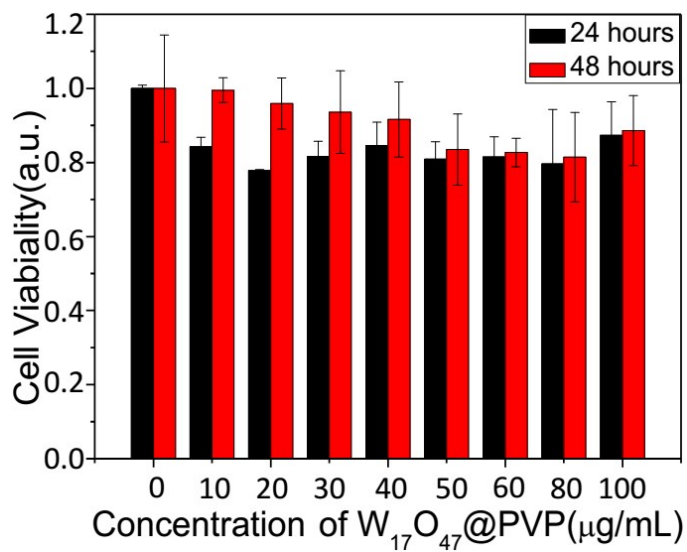

**Figure S2.** Cell viability tests of  $W_{17}O_{47}@PVP$  nanoneedles after 24 and 48 h incubation, respectively. The cells used here are HeLa cells.
